# Supplementary material for: Managing Small Airway Disease in Patients with Severe Asthma: Transitioning from the “Silent Zone” to Achieving “Quiet Asthma”
Source: MDPI journal article supplement (doi:10.3390/jcm13082320), 2024-04-17
Supplement: s1 [file s1]

**Supplemental Table S1.** Subgroup Analysis: Assessing T0 versus T3 within Each Subgroup Utilizing a Specific Combination of Open Triple Therapy.

|                                                   | Bud /form Turb+ Acl<br>N= 4 |                 |                | Bud /form Turb + Tio<br>N= 7 |                 |                | Bud /form Spir + Tio<br>N=6 |             |                | Ume/Vil Ell +<br>Tio<br>N=8 |                 |                | BDP/FF Nex + Tio<br>N=7 |                 |                |
|---------------------------------------------------|-----------------------------|-----------------|----------------|------------------------------|-----------------|----------------|-----------------------------|-------------|----------------|-----------------------------|-----------------|----------------|-------------------------|-----------------|----------------|
| Parameters                                        | TO                          | T3              | P<br>val<br>ue | TO                           | T3              | P<br>val<br>ue | TO                          | T3          | P<br>val<br>ue | TO                          | T3              | P<br>val<br>ue | TO                      | T3              | P<br>val<br>ue |
| ACT m ± sd                                        | 19±4.54                     | 22.25±2.2<br>1  | 0.09<br>0      | 13.85±5.0<br>1               | 23.14±1.0<br>6  | 0.00<br>4      | 15.16±6.61                  | 22.66±1.21  | 0.05<br>2      | 17.25±6.43                  | 22.62±1.92      | 0.03<br>4      | 14.57±6.72              | 21.85±0.89      | 0.03<br>9      |
| Average reliver<br>usage last month<br>(n) m ± sd | 0.25±0.5                    | 0.5±0.57        | 0.39<br>1      | 2.85±1.77                    | 0.57±1.51       | 0.02<br>2      | 0.16±0.40                   | 0.00±0.00   | 0.36<br>3      | 0.62±1.40                   | 0.00±0.00       | 0.25<br>0      | 0.85±1.46               | 0.28±0.48       | 0.35<br>6      |
| %FEV1 m ± sd                                      | 85.42±26.<br>25             | 74.25±28.<br>21 | 0.38<br>0      | 70.3±23.0<br>5               | 68.42±13.<br>90 | 0.74<br>3      | 79.5±30.76                  | 77.33±33.80 | 0.55<br>3      | 63.21±15.17                 | 75.01±23.2<br>9 | 0.29<br>0      | 21.90±8.27              | 27.68±10.4<br>6 | 0.97<br>5      |
| %FVC m ± sd                                       | 101.05<br>±30.84            | 95±10.03        | 0.71<br>0      | 74.11±16.<br>22              | 75.42±12.<br>86 | 0.81<br>5      | 89.83±21.88                 | 84.83±15.27 | 0.39<br>1      | 78.8±14.78                  | 88.92±10.5<br>3 | 0.20<br>5      | 89.01±13.5<br>4         | 90.8±22.41      | 0.63<br>8      |
| %FEV1/FVC m ±<br>sd                               | 65.19±6.3<br>3              | 66.32±4.3<br>3  | 0.71<br>7      | 69.21±16.<br>55              | 68.06±12.<br>70 | 0.80<br>1      | 69.99±16.45                 | 69.48±12.82 | 0.82<br>1      | 64.42±12.92                 | 68.71±17.6<br>4 | 0.44<br>4      | 66.92±9.99              | 66.27±11.2<br>8 | 0.86<br>9      |

|                                                         |                       |                       |       |                      |                  |       |                    |                    |       |                    |                   |       |                  |                 |       |
|---------------------------------------------------------|-----------------------|-----------------------|-------|----------------------|------------------|-------|--------------------|--------------------|-------|--------------------|-------------------|-------|------------------|-----------------|-------|
| %FEV 25-75 m ± sd                                       | 43.50±13.12           | 68.75±13.14           | 0.005 | 50.71±65.57          | 13.97±16.24      | 0.007 | 47.16±13.22        | 61.33±11.34        | 0.003 | 50±16.32           | 63.87±15.68       | 0.004 | 48.71±12.25      | 60.42±12.36     | 0.010 |
| %Rtot m ± sd                                            | 111±33.49             | 180.25±12.0.66        | 0.252 | 172.85±15.9.21       | 141.57±44.60     | 0.619 | 116.25±58.35       | 141±55,23          | 0.175 | 125.46±36.08       | 118.40±54.00      | 0.736 | 187.22±58.47     | 191.14±62.81    | 0.092 |
| %TLC m ± sd                                             | 123.72±16.75          | 108.32±24.39          | 0.314 | 96.92±11.25          | 89.42±14.61      | 0.203 | 101.5±35           | 93±26.74           | 0.146 | 113.47±23.60       | 119.15±20.73      | 0.323 | 102.41±15.38     | 98.10±13.88     | 0.334 |
| %RV m ± sd                                              | 172.32±55.68          | 136.25±26.13          | 0.196 | 153.04±51.98         | 132.14±50.29     | 0.190 | 159.85±111.47      | 121.33±50.08       | 0.214 | 196.5±53.48        | 182±63.82         | 0.151 | 151.27±25.97     | 125.54±36.14    | 0.027 |
| %RV/TLC m ± sd                                          | 136.62±26.13          | 132±34.72             | 0.309 | 152.05±44.82         | 138.27±43.38     | 0.091 | 136.75±62.27       | 124±40.40          | 0.486 | 162.62±23.24       | 146.41±24.90      | 0.009 | 147.74±7.29      | 130.24±34.66    | 0.166 |
| R5-20 kPa·L <sup>-1</sup> ·s <sup>-1</sup> IQ (25 ; 75) | 0.28 (0.11 ; 0.30)    | 0.09 (0.03 ; 0.18)    | 0.144 | 0.12 (0.09;0.12)     | 0.06 (0.04;0.07) | 0.018 | 0.11(0.05;0.24)    | 0.06(0.01;0.09)    | 0.042 | 0.11(0.04;0.31)    | 0.06(0.02;0.08)   | 0.028 | 0.16 (0.15;0.40) | 0.1(0.07;0.14)  | 0.018 |
| Fres Hz IQ (25 ; 75)                                    | 23.10 (19.10 ; 24.01) | 17.57 (14.79 ; 24.62) | 0.273 | 18.03 (15.82; 24.58) | 13(11.4;14.05)   | 0.018 | 22.84(17.74;27.29) | 16.89(13.56; 2075) | 0.027 | 20.78(16.02;27.34) | 15.31(8.11; 19.5) | 0.093 | 21(16.68;22.88)  | 18.1(15.0;19.0) | 0.176 |
| AX kPa/L IQ (25 ; 75)                                   | 1.98 (0.72 ; 3.91)    | 0.80 (0.45 ; 2.35)    | 0.465 | 0.99 (0.83;1.86)     | 0.7(0.35;1.01)   | 0.128 | 1.03(0.36;2.29)    | 0.62(0.38;0.62)    | 0.116 | 1.01(0.22;1.44)    | 0.76(0.11;2.39)   | 0.161 | 1.7(0.51;1.9)    | 1.3(1.2;1.78)   | 0.612 |

|                                                   |                               |                   |           |                       |                     |           |                       |                        |           |                        |                        |           |                      |                     |           |
|---------------------------------------------------|-------------------------------|-------------------|-----------|-----------------------|---------------------|-----------|-----------------------|------------------------|-----------|------------------------|------------------------|-----------|----------------------|---------------------|-----------|
| 0.038X5<br>kPa·L <sup>-1</sup> ·s-IQ (25 ;<br>75) | -1.21 (-<br>1.65 ; -<br>1.20) |                   | 0.06<br>8 | -1.23 (-<br>1.4;-0.9) | -0.5(-0.8;-<br>0.5) | 0.01<br>8 | -1.15(-2.1;-<br>0.72) | -0.65(-0.92;-<br>0.32) | 0.02<br>8 | -1.05(-1.72;-<br>0.75) | -0.55(-<br>0.87;-0.50) | 0.01<br>1 | -1.1(-1.3;-<br>1.01) | -0.8(-0.0;-<br>0.5) |           |
| Eosinophils<br>(n/μl) m ± sd                      | 326.66±11<br>1.50             | 350.00±14<br>5.25 | 0.68<br>9 | 240±235.2<br>3        | 210±206.6<br>3      | 0.24<br>7 | 187±40.40             | 193.33±85.18           | 0.47<br>0 | 268±352.31             | 248.5±316.<br>74       | 0.21<br>3 | 351±397.28           | 328.42±38<br>2.53   | 0.33<br>9 |
| FeNO 50 (ppb) m<br>± sd                           | 11.75±4.5<br>7                | 30.50±41.<br>29   | 0.42<br>9 | 10.85±7.4<br>7        | 10.86±7.7<br>6      | 0.99      | 15.66±19.89           | 8.5±3.37               | 0.34<br>2 | 13.75±15.50            | 10.25±611              | 0.59<br>2 | 9.42±3.45            | 16.57±15.7<br>6     | 0.26<br>9 |
| FeNO350 (ppb)<br>m ± sd                           | 24.25±14.<br>77               | 20±20.63          | 0.64<br>7 | 22.57±7.8<br>5        | 15.39±4.8<br>1      | 0.01<br>4 | 19.5±15.78            | 6.83±6.67              | 0.12<br>1 | 20-75±14.29            | 7.75±7.09              | 0.03<br>9 | 22.85±13.5<br>9      | 8.57±6.34           | 0.03<br>5 |

Abbreviations: BUD, budesonide; FF, formoterol fumarate; Turb, turbohaler; Tio, tiotropium RespiMat; Acl, aclidinium Genuair; Spir, spiromax; BID, bis in die; QD, quam die; BDP, beclomethasone dipropionate; Ume/Vil Ell, Umeclidinium/Vilanterolo Ellipta; Nex, Nexthaler; GINA, Global Initiative for Asthma ACT, Asthma Control Test; FEV1, forced expiratory volume in the 1st second; FVC, forced vital capacity; FEF25–75, forced expiratory flow between 25% and 75% of FVC; TLC, total lung capacity; Rtot, total resistance; RV, Residual volume; R5-R20, airway resistance from 5 to 20 Hz; Fres, resonance frequency; AX, reactance area; X5, reactance at 5 Hz; Eos, eosinophilia; FeNO 50, fractional exhaled nitric oxide at 50 ml/s; FeNO 350, fractional exhaled nitric oxide at 350 ml/s; m ± sd, mean ± standard deviation; n, number; IQ 25 75, interquartile 25 75; kPa·L<sup>-1</sup>·s<sup>-1</sup>, kiloPascal per litro al secondo; kPa/L, kiloPascal per litro; Hz, Hertz ; kPa·L<sup>-1</sup>·s<sup>-1</sup>, kiloPascal per litro al secondo; ppb, parts per billion . Data are displayed as n(%) or mean ± SD **or median IQ 25;75**

**Suppl Figure S1.** Clinical and Inflammatory change from time T0 to T3 for each subgroup

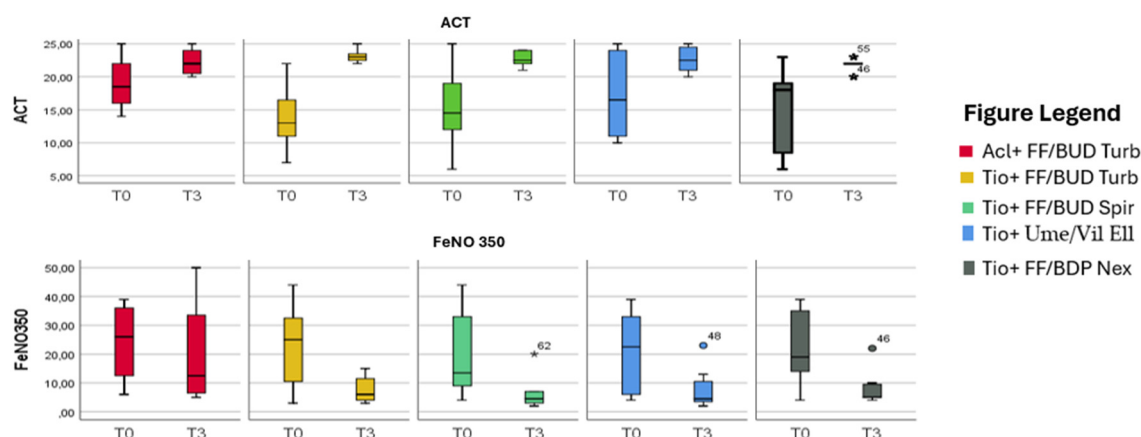

Acl+ FF/BUD Turb: n= 4; Acl+ FF/BUD Turb: n=7 ; Tio+ FF/BUD Spir: n=6 ; Tio+ Ume/Vil Ell: n=8; Tio+ FF/BDP Nex: n=7  
Analysis within each subgroup defined based on the specific combination of open therapy. Clinical and Inflammatory change from time T0 to T3

Abbreviations: BUD, budesonide; FF, formoterol fumarate; Turb, turbobaler; Tio, tiotropium Respimat; Acl, acclidinium Genuair; Spir, spiromax; BID, bis in die; QD, quam die; BDP, beclomethasone dipropionate; Ume/Vil Ell, Umeclidinium/Vilanterolo Ellipta; Nex, Nexthaler; GINA, Global Initiative for Asthma ACT, Asthma Control Test;; FeNO 350, fractional exhaled nitric oxide at 350 ml/s; Supl, supplementary

**Figure S2.** Functional control of Small Airway Disease from time T0 to T3 for each subgroup

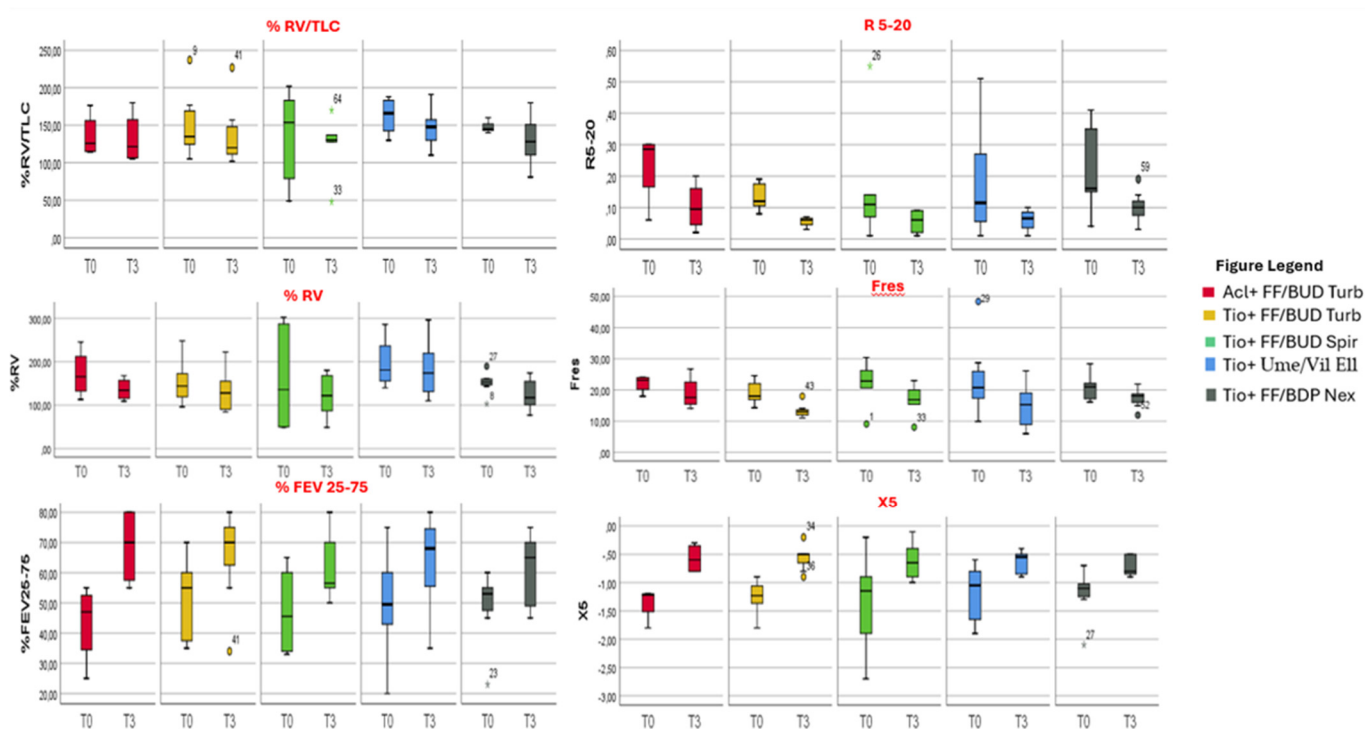

Acl+ FF/BUD Turb: n= 4; Acl+ FF/BUD Turb: n=7 ; Tio+ FF/BUD Spir: n=6 ; Tio+ Ume/Vil Ell: n=8; Tio+ FF/BDP Nex: n=7

Analysis within each subgroup defined based on the specific combination of open therapy.

Functional control of Small Airway Disease from time T0 to T3

Abbreviations: BUD, budesonide; FF, formoterol fumarate; Turb, turbohaler; Tio, tiotropium Respimat; Acl, aclidinium Genuair; Spir, spiromax; BID, bis in die; QD, quam die; BDP, beclomethasone dipropionate; Ume/Vil Ell, Umeclidinium/Vilanterolo Ellipta; Nex, Nexthaler; GINA, Global Initiative for Asthma ACT, Asthma Control Test; FEV1, forced expiratory volume in the 1st second; FVC, forced vital capacity; FEF25–75, forced expiratory flow between 25% and 75% of FVC; TLC, total lung capacity; R<sub>tot</sub>, total resistance; RV, Residual volume; R5-R20, airway resistance from 5 to 20 Hz; F<sub>res</sub>, resonance frequency; AX, reactance area; X5, reactance at 5 Hz; Eos, eosinophilia; FeNO 50, fractional exhaled nitric oxide at 50 ml/s; FeNO 350, fractional exhaled nitric oxide at 350 ml/s;  $m \pm sd$ , mean  $\pm$  standard deviation; n, number; IQ 25 75, interquartile 25 75;  $kPa \cdot L^{-1} \cdot s^{-1}$ , kiloPascal per litro al secondo; kPa/L, kiloPascal per litro; Hz, Hertz ;  $kPa \cdot L^{-1} \cdot s^{-1}$ , kiloPascal per litro al secondo; ppb, parts per billion . Data are displayed as n(%) or mean  $\pm$  SD or median IQ 25;75; Supl, supplementary
